# Supplementary material for: pH dependent sensitization of europium in a hydrogen bonded three-dimensional metal–organic compound with (4966)2(4462)3 topology: luminescence titration and time-resolved studies
Source: Royal Society of Chemistry journal article supplement (doi:10.1039/d1ma00980j), 2021-11-24
Supplement: d1ma00980j1.pdf [file d1ma00980j1.pdf]

**pH Dependent Sensitization of Europium in a Hydrogen Bonded Three-  
Dimensional Metal-Organic Compounds with  $(4^96^6)_2(4^46^2)_3$  Topology:  
Luminescence Titration and Time-resolved Studies**

Pooja Daga,<sup>a</sup> Sayani Hui,<sup>b</sup> Sourav Sarkar,<sup>b</sup> Prakash Majee,<sup>a</sup> Debal Kanti Singha,<sup>a,b</sup> Partha  
Mahata<sup>b\*</sup> and Sudip Kumar Mondal<sup>a\*</sup>

<sup>a</sup>Department of Chemistry, Siksha-Bhavana, Visva-Bharati University, Santiniketan-731235, West Bengal,  
India. Email: [sudip.mondal@visva-bharati.ac.in](mailto:sudip.mondal@visva-bharati.ac.in)

<sup>b</sup>Department of Chemistry, Jadavpur University, Jadavpur, Kolkata-700 032, West Bengal, India.  
Email: [parthachem@gmail.com](mailto:parthachem@gmail.com)

**ELECTRONIC SUPPLEMENTARY INFORMATION**

**Table S1.** Selected bond distances (Å) observed in  $[Y_2(pydc)_6(H_2pip)_3] \cdot 20H_2O$  (pydc = 2,6-pyridine dicarboxylate,  $H_2pip$  = diprotonated piperazine), **1**.

| Bond         | Distances, Å | Bond         | Distances, Å |
|--------------|--------------|--------------|--------------|
| Y(1)-O(1)    | 2.397(2)     | Y(1)-O(3) #2 | 2.406(2)     |
| Y(1)-O(1)#1  | 2.397(2)     | Y(1)-N(1)    | 2.484(2)     |
| Y(1)-O(1) #2 | 2.397(2)     | Y(1)-N(1) #1 | 2.484(2)     |
| Y(1)-O(3)    | 2.406(2)     | Y(1)-N(1) #1 | 2.484(2)     |
| Y(1)-O(3) #1 | 2.406(2)     |              |              |

Symmetry transformations used to generate equivalent atoms: #1  $-y+1, x-y+1, z$  #2  $-x+y, -x+1, z$

**Table S2.** Selected bond angles observed in  $[Y_2(\text{pydc})_6(\text{H}_2\text{pip})_3]\cdot 20\text{H}_2\text{O}$  (pydc = 2,6-pyridine dicarboxylate,  $\text{H}_2\text{pip}$  = diprotonated piperazine), **1**.

| Angle              | Amplitude (°) | Angle              | Amplitude (°) |
|--------------------|---------------|--------------------|---------------|
| O(1)#1-Y(1)-O(1)#2 | 77.36(8)      | O(3)-Y(1)-N(1)     | 64.41(7)      |
| O(1)#1-Y(1)-O(1)   | 77.36(8)      | O(3)#1-Y(1)-N(1)   | 133.68(8)     |
| O(1)#2-Y(1)-O(1)   | 77.36(8)      | O(3)#2-Y(1)-N(1)   | 71.34(7)      |
| O(1)#1-Y(1)-O(3)   | 89.14(8)      | O(1)#1-Y(1)-N(1)#1 | 64.21(7)      |
| O(1)#2-Y(1)-O(3)   | 147.64(7)     | O(1)#2-Y(1)-N(1)#1 | 76.31(7)      |
| O(1)-Y(1)-O(3)     | 128.58(7)     | O(1)-Y(1)-N(1)#1   | 137.09(7)     |
| O(1)#1-Y(1)-O(3)#1 | 128.58(7)     | O(3)-Y(1)-N(1)#1   | 71.34(7)      |
| O(1)#2-Y(1)-O(3)#1 | 89.14(8)      | O(3)#1-Y(1)-N(1)#1 | 64.41(7)      |
| O(1)-Y(1)-O(3)#1   | 147.64(7)     | O(3)#2-Y(1)-N(1)#1 | 133.68(8)     |
| O(3)-Y(1)-O(3)#1   | 76.43(9)      | N(1)-Y(1)-N(1)#1   | 119.915(6)    |
| O(1)#1-Y(1)-O(3)#2 | 147.64(8)     | O(1)#1-Y(1)-N(1)#2 | 137.09(7)     |
| O(1)#2-Y(1)-O(3)#2 | 128.58(7)     | O(1)#2-Y(1)-N(1)#2 | 64.21(7)      |
| O(1)-Y(1)-O(3)#2   | 89.14(8)      | O(1)-Y(1)-N(1)#2   | 76.31(7)      |
| O(3)-Y(1)-O(3)#2   | 76.43(9)      | O(3)-Y(1)-N(1)#2   | 133.68(8)     |
| O(3)#1-Y(1)-O(3)#2 | 76.43(9)      | O(3)#1-Y(1)-N(1)#2 | 71.34(7)      |
| O(1)#1-Y(1)-N(1)   | 76.31(7)      | O(3)#2-Y(1)-N(1)#2 | 64.41(7)      |
| O(1)#2-Y(1)-N(1)   | 137.09(8)     | N(1)-Y(1)-N(1)#2   | 119.916(6)    |
| O(1)-Y(1)-N(1)     | 64.20(7)      | N(1)#1-Y(1)-N(1)#2 | 119.915(6)    |

Symmetry transformations used to generate equivalent atoms: #1 -y+1,x-y+1,z #2 -x+y,-x+1,z

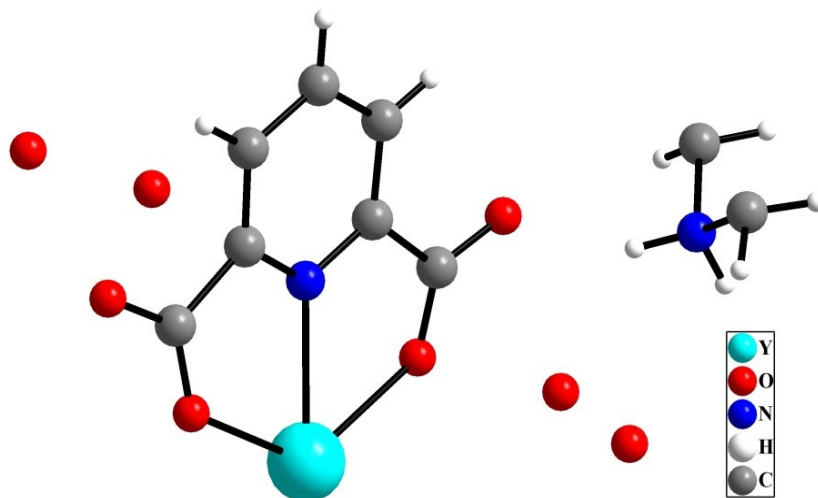

**Figure S1.** Figure shows the asymmetric unit in  $[Y_2(\text{pydc})_6(\text{H}_2\text{pip})_3]\cdot 20\text{H}_2\text{O}$  (pydc = 2,6-pyridine dicarboxylate,  $\text{H}_2\text{pip}$  = diprotonated piperazine), **1**. The hydrogen atoms in water molecules have not been located.

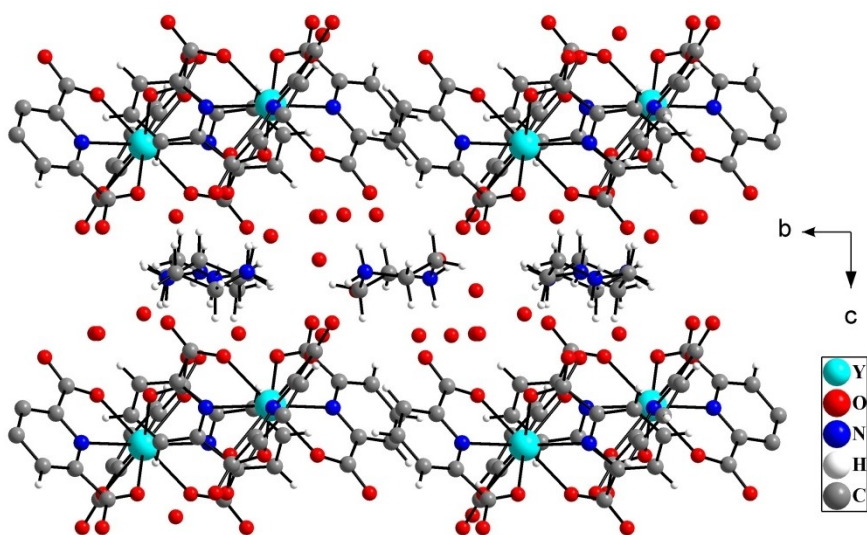

**Figure S2.** Figure shows the three-dimensional arrangement in *bc* in  $[\text{Y}_2(\text{pydc})_6(\text{H}_2\text{pip})_3]\cdot 20\text{H}_2\text{O}$  (pydc = 2,6-pyridine dicarboxylate,  $\text{H}_2\text{pip}$  = diprotonated piperazine), **1**. The hydrogen atoms in water molecules have not been located.

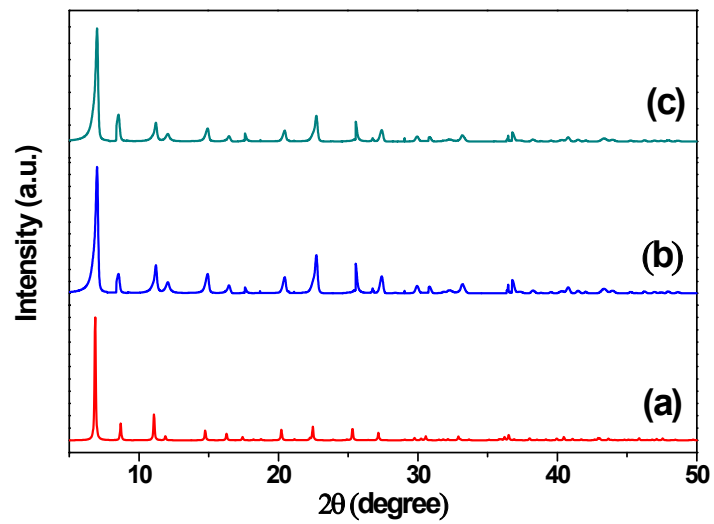

**Figure S3.** Powder XRD ( $\text{Cu K}\alpha$ ) patterns of (a) **1** (simulated from single-crystal X-ray data), (b) as synthesized **1** (experimental) and (c) as synthesized **1a** (experimental).

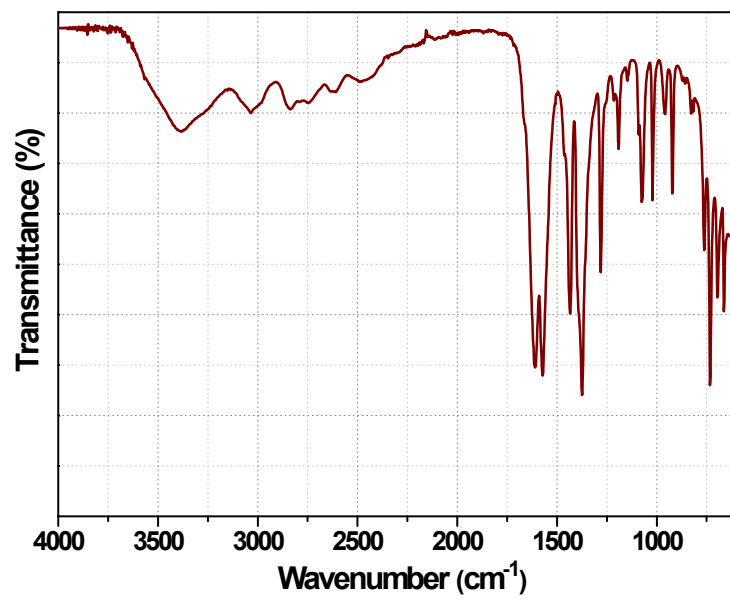

Figure S4. FTIR spectrum of 1.

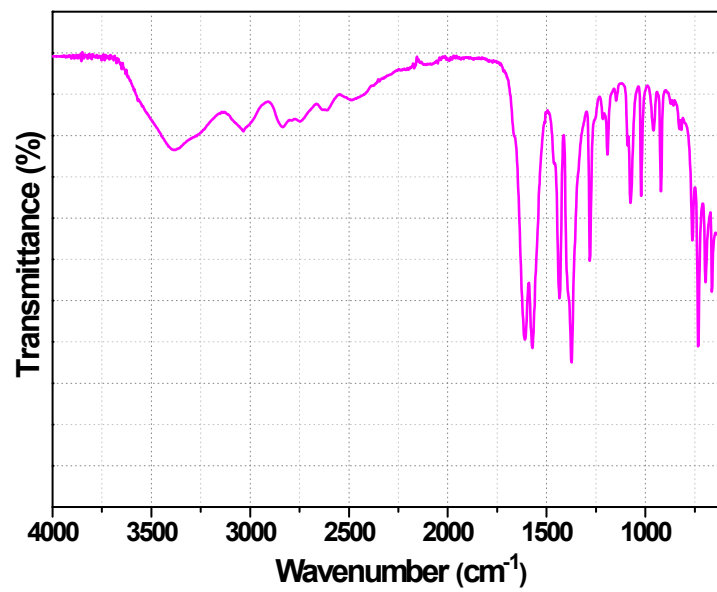

Figure S5. FTIR spectrum of 1a.



**Table S3.** The observed IR bands for compounds **1** and **1a**.

| Bands                                         | Wavenumber (cm <sup>-1</sup> ) | Bands                                                      | Wavenumber (cm <sup>-1</sup> )            |
|-----------------------------------------------|--------------------------------|------------------------------------------------------------|-------------------------------------------|
| $\nu_{\text{asy. str}}$ (aromatic N-H)        | 3387(m)                        | $\nu_{\text{sy. str}}$ (carboxylate)                       | 1435(s), 1372(s)                          |
| $\nu_{\text{str}}$ (aromatic C-H)             | 3034(w)                        | $\nu_{\text{str}}$ (C-N)                                   | 1574(s), 1280(s), 1214(m)                 |
| $\nu_{\text{asy. str}}$ (sp <sup>3</sup> C-H) | 2972(w)                        | $\delta$ (aromatic C-H) <sub>in plane</sub><br>bending     | 1193(s), 1147(m),<br>1074(m)              |
| $\nu_{\text{sy. str}}$ (sp <sup>3</sup> C-H)  | 2832(w), 2742(w)               | $\delta$ (aromatic C-H) <sub>out of plane</sub><br>bending | 920(s), 875(w), 858(w),<br>825(w), 758(w) |
| $\nu_{\text{asy. str}}$ (carboxylate)         | 1606(s)                        | $\delta$ (carboxylate) <sub>bending</sub>                  | 728(s), 695(w)                            |

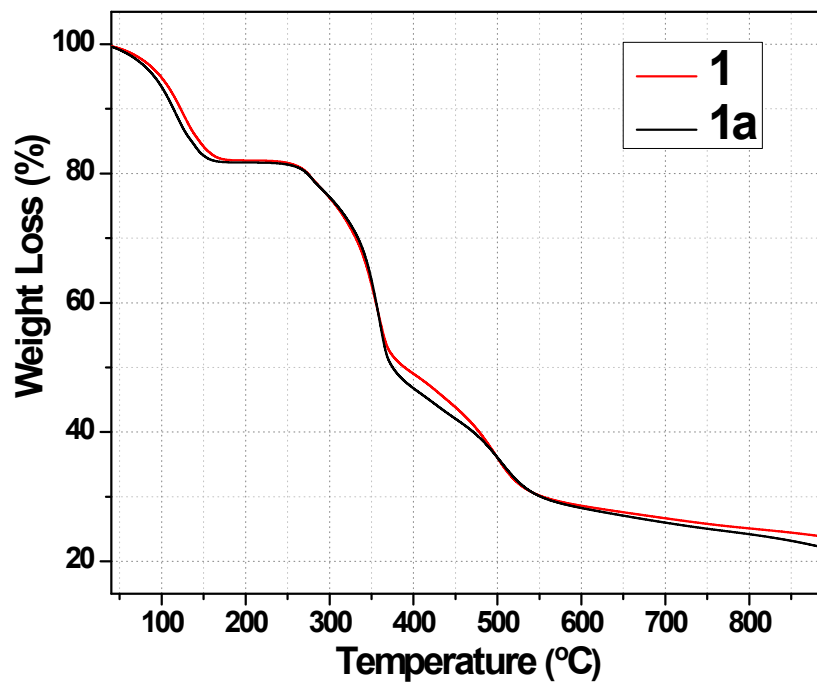

**Figure S6.** Thermogravimetric analysis (TGA) data of **1** and **1a**, in a nitrogen atmosphere. The plot shows % weight loss of **1** and **1a** with the increase in temperature.

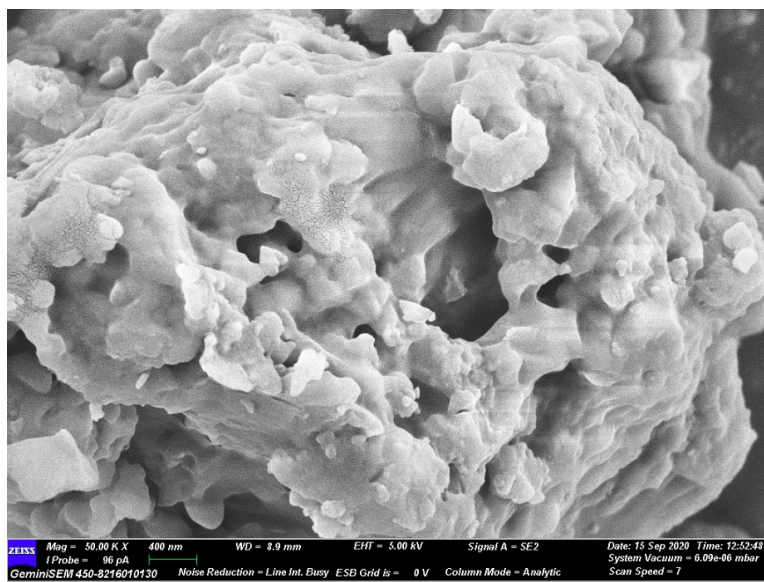

Figure S7. SEM image of 1a.

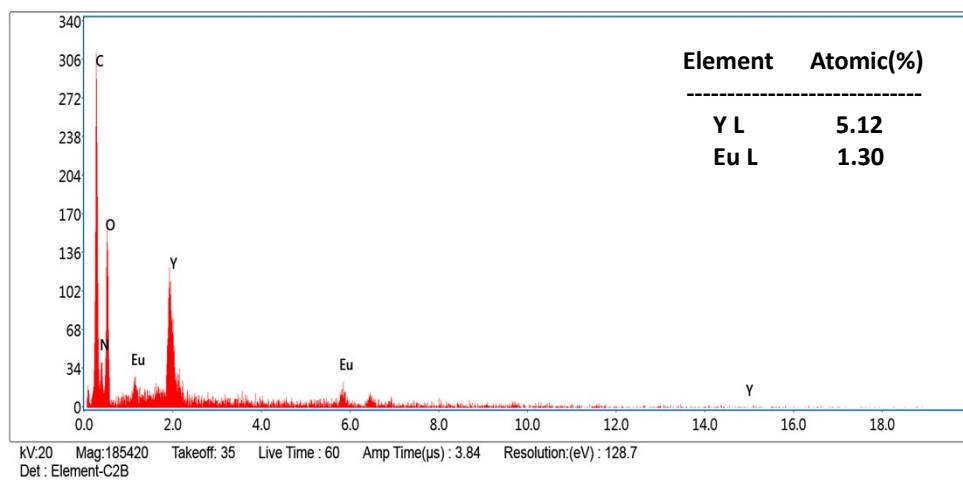

**Figure S8.** Representative EDX plot of **1a**. The figure demonstrates that Eu and Y are present in the molar ratio of ~ 1:4.

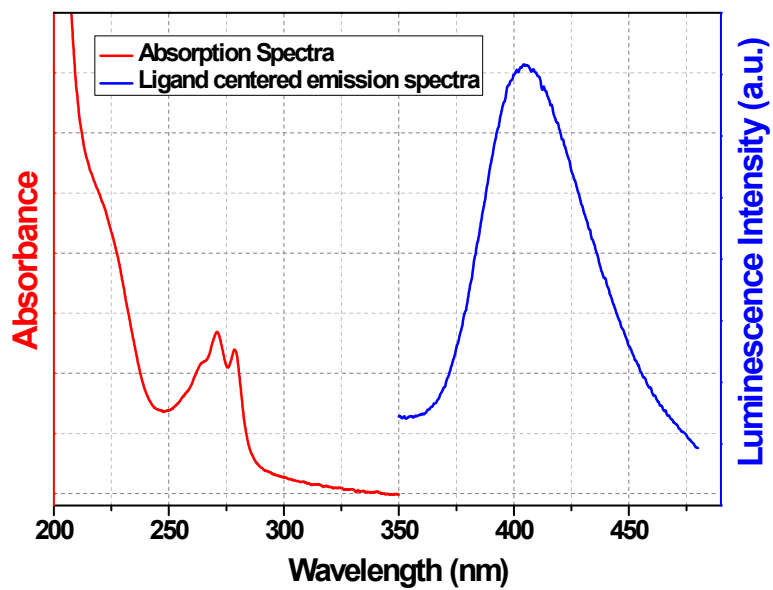

Figure S9. UV-Visible absorption spectrum of **1a** and ligand-centered emission spectra of **1a**.

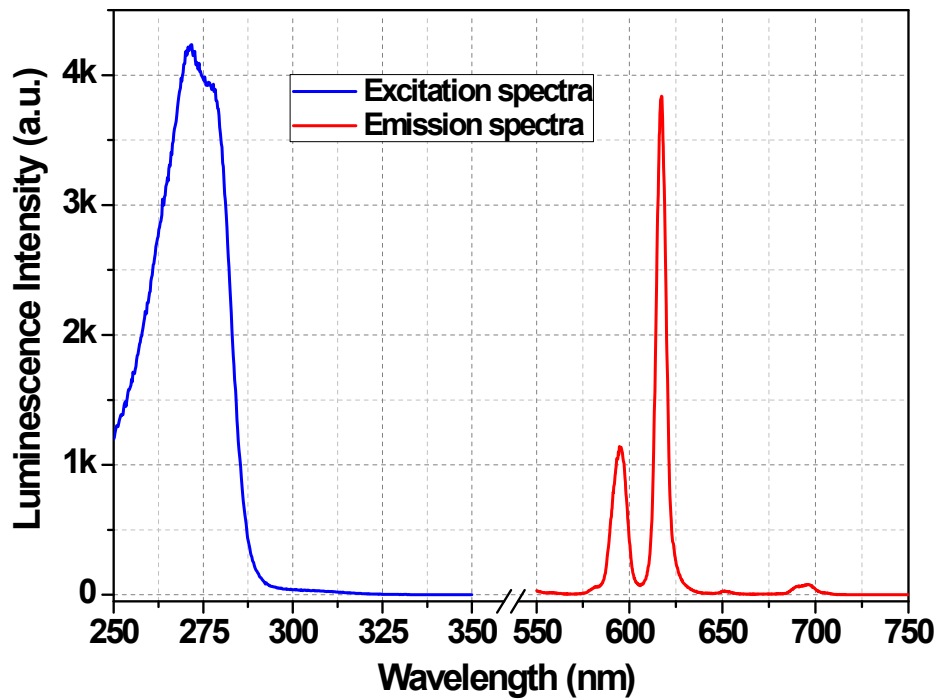

**Figure S10.** Excitation and emission spectra of **1a**. The excitation wavelength was chosen at 280 nm for emission spectra and for the excitation spectra, emission was fixed at 616 nm.

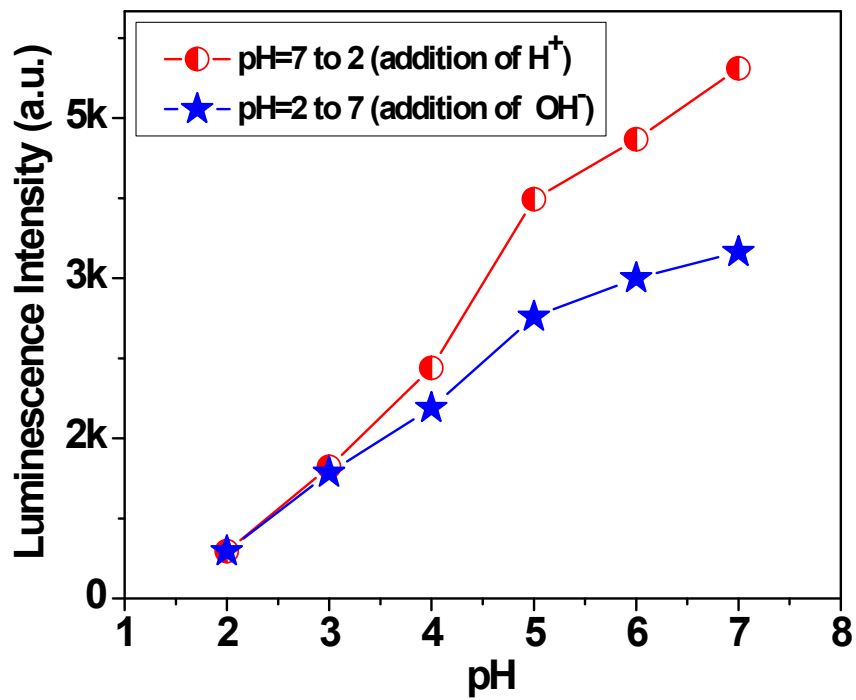

**Figure S11.** Plot of luminescence intensity (monitored at 616 nm) vs pH. The plot indicates the partial reversible pH response of compound **1a** in the pH range of 2–7.

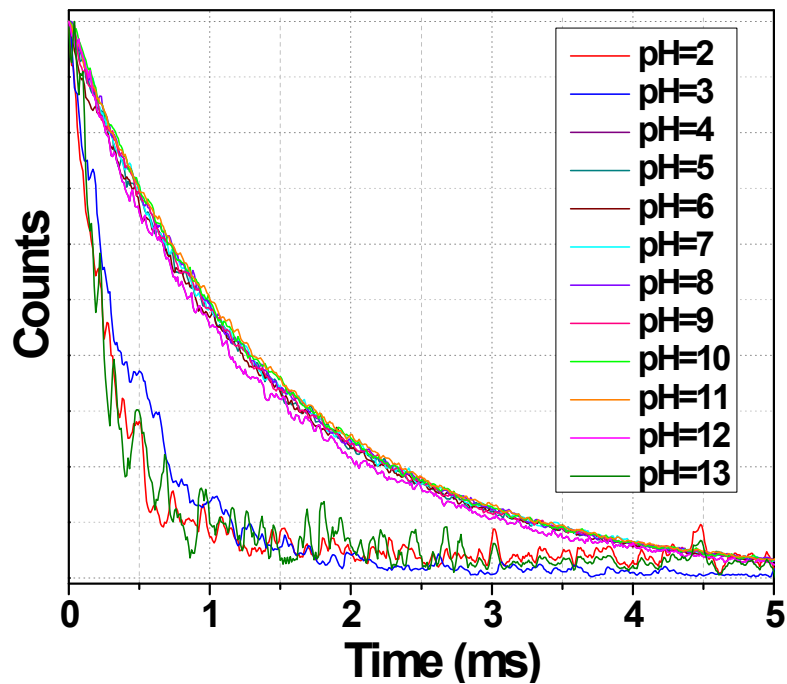

Figure S12. Luminescence lifetime decay observed at  $\lambda_{\text{ex}} = 280 \text{ nm}$  and  $\lambda_{\text{em}} = 616 \text{ nm}$  at different pH values.
